# Supplementary material for: Bioinspired Oxidation-Resistant Catechol-like Sliding Ring Polyrotaxane Hydrogels
Source: MDPI journal article supplement (doi:10.3390/gels9020085), 2023-01-19
Supplement: s1 [file s1]

# Bioinspired Oxidation-Resistant Catechol-Like Sliding Ring Polyrotaxane Hydrogels

## CONTENTS

|                                                                               |   |
|-------------------------------------------------------------------------------|---|
| 1. SPECTRAL DATA .....                                                        | 2 |
| 1.1 $^1\text{H}$ and $^{13}\text{C}$ NMR spectra of compounds 4a and 4b ..... | 2 |
| 1.2 Comparative $^1\text{H}$ NMR spectra of all derivatives .....             | 4 |
| 1.3 Rheological characterization.....                                         | 6 |

## 1. SPECTRAL DATA

### 1.1 $^1\text{H}$ and $^{13}\text{C}$ NMR spectra of compounds 4a and 4b

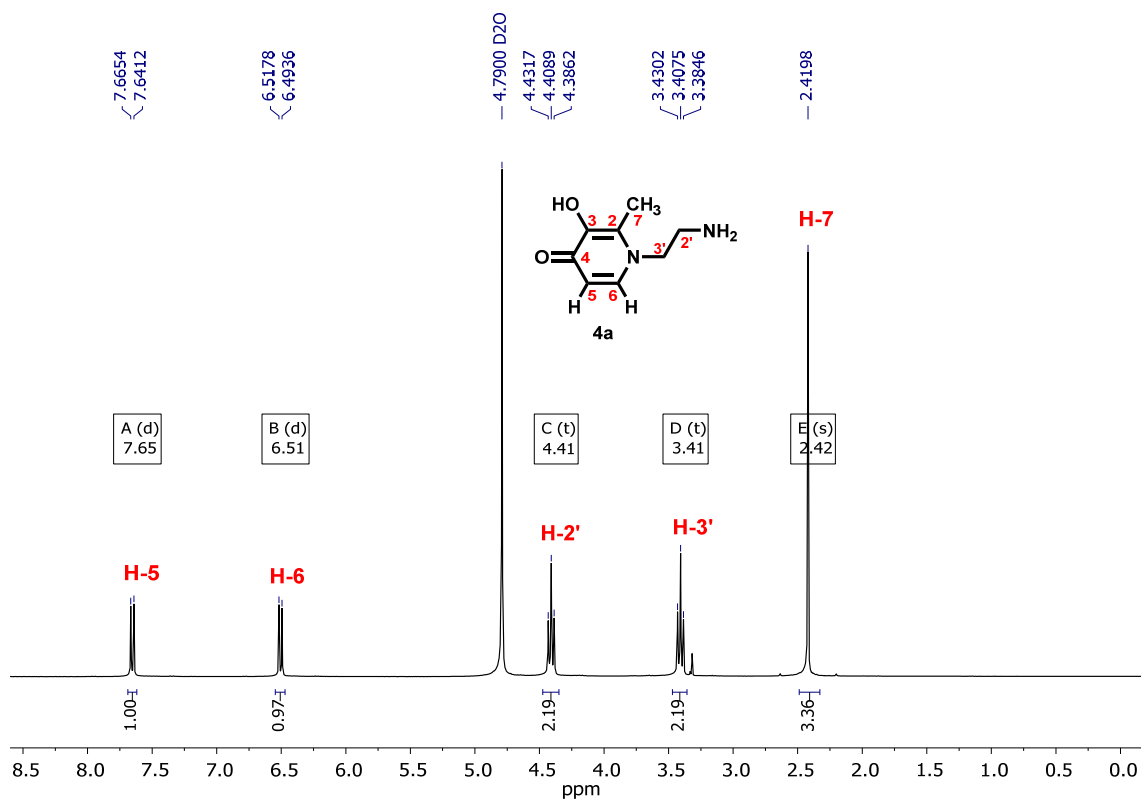

Figure S1.  $^1\text{H}$  NMR Spectrum (300.0 MHz,  $\text{D}_2\text{O}$ ) of HOPO- $\text{NH}_2$  (4a).

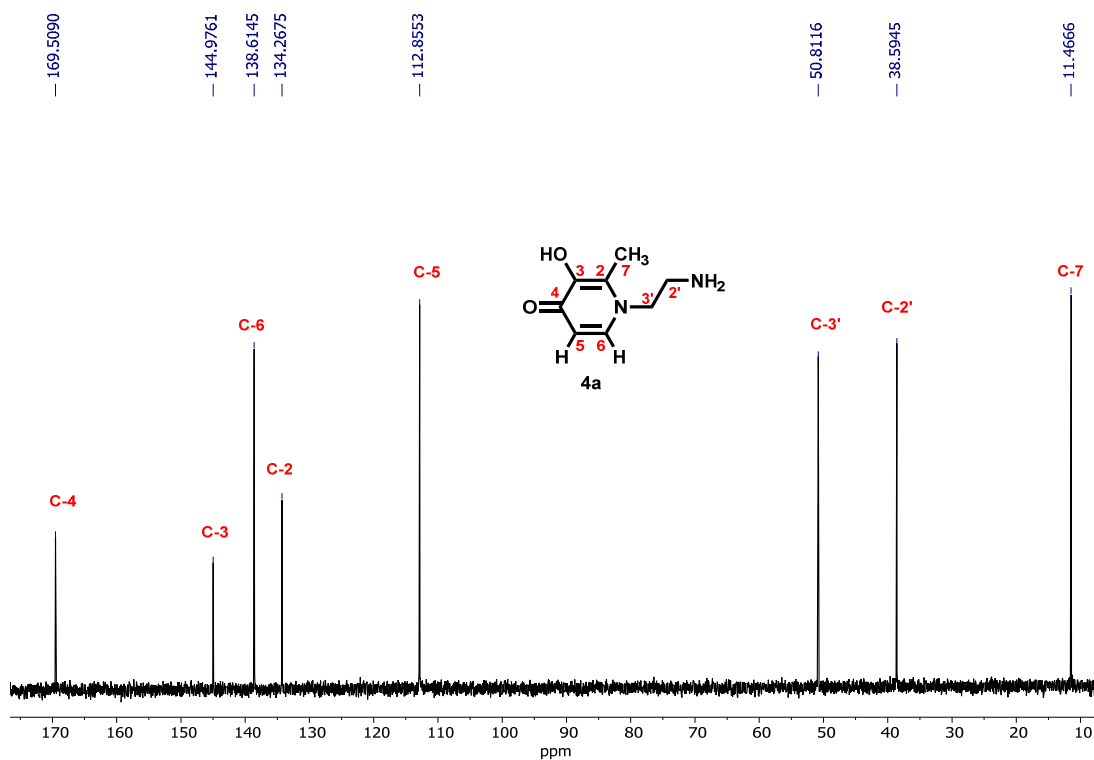

Figure. S2.  $^{13}\text{C}$  NMR Spectrum (75.0 MHz,  $\text{D}_2\text{O}$ ) of HOPO- $\text{NH}_2$  (4a).

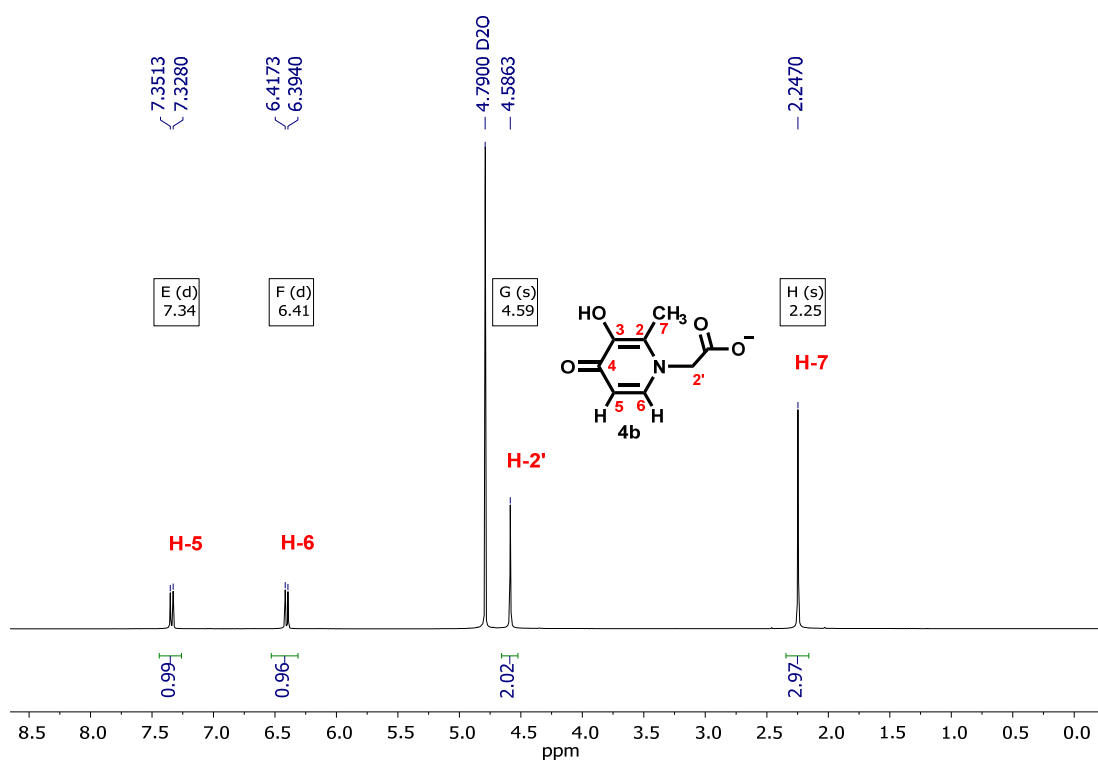

**Figure S3.**  $^1\text{H}$  NMR Spectrum (300.0 MHz,  $\text{D}_2\text{O}+\text{NaOD}$ ) of HOPO- $\text{CO}_2\text{H}$  (**4b**).

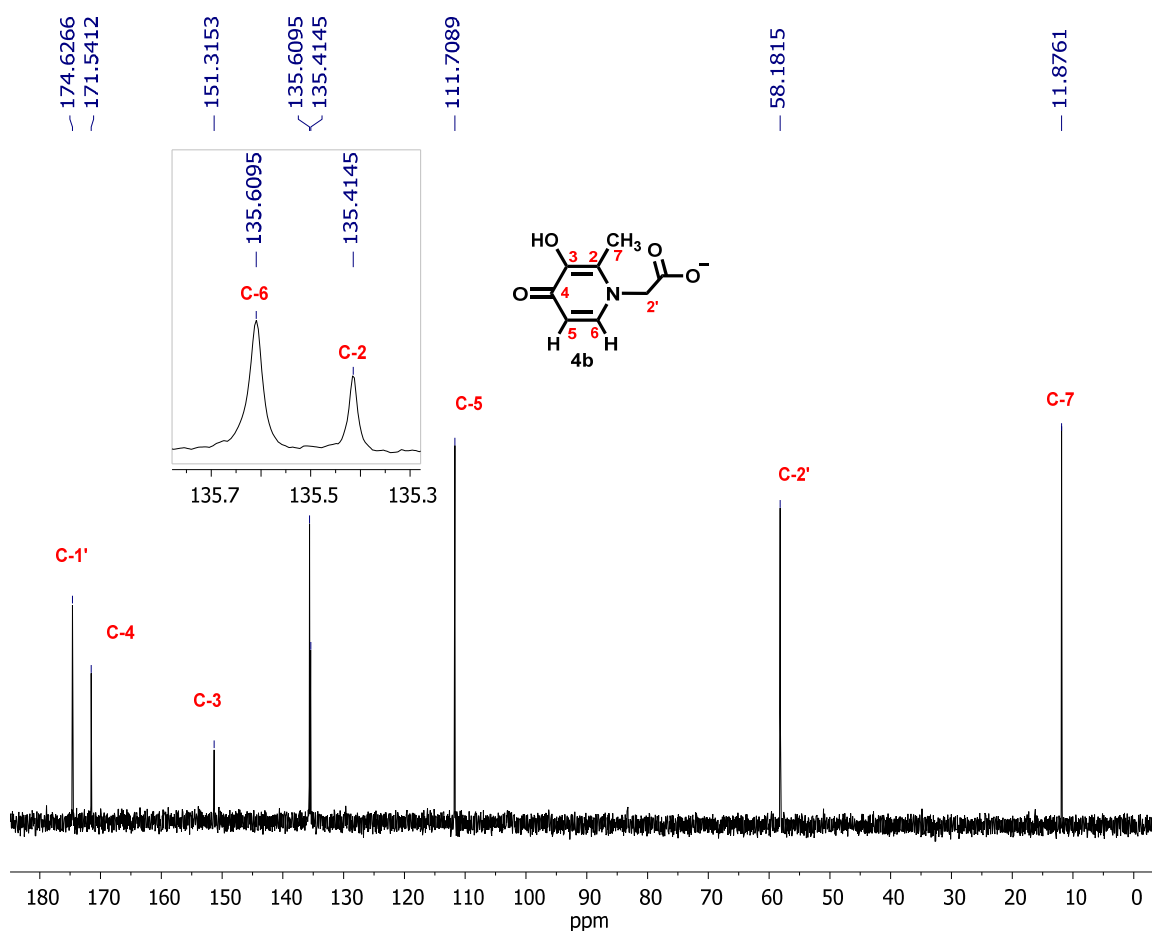

**Figure S4.**  $^{13}\text{C}$  NMR Spectrum (75.0 MHz,  $\text{D}_2\text{O}+\text{NaOD}$ ) of HOPO- $\text{CO}_2\text{H}$  (**4b**).

## 1.2 Comparative $^1\text{H}$ NMR spectra of all derivatives

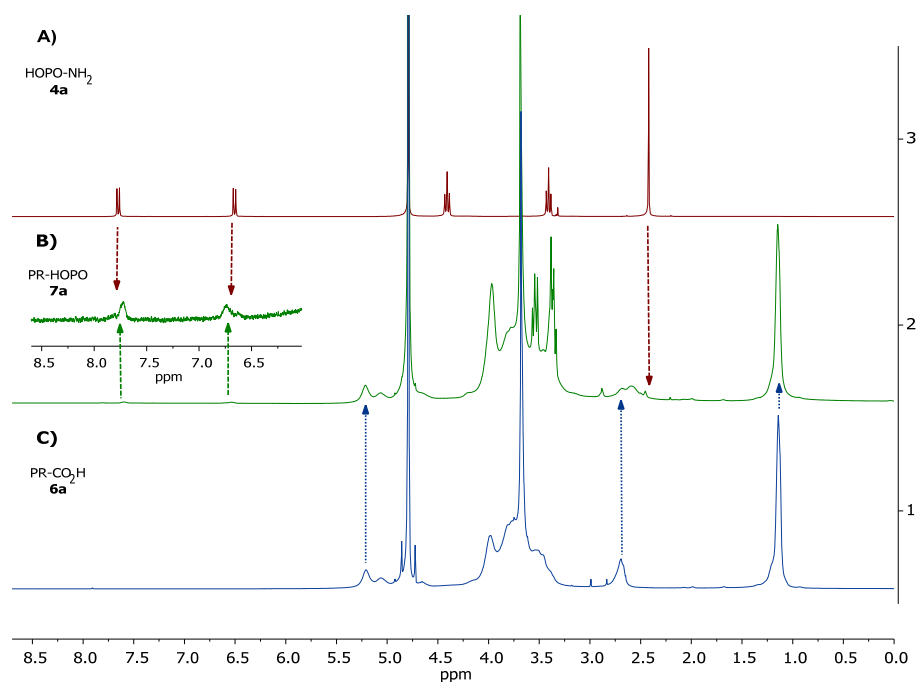

**Figure. S5.** Comparative  $^1\text{H}$  NMR Spectra ( $\text{D}_2\text{O}$ , 300.0 MHz) of **A.** HOPO-NH<sub>2</sub> (**4a**), **B.** PR-HOPO (**7a**), and **C.** PR-CO<sub>2</sub>H (**6a**).

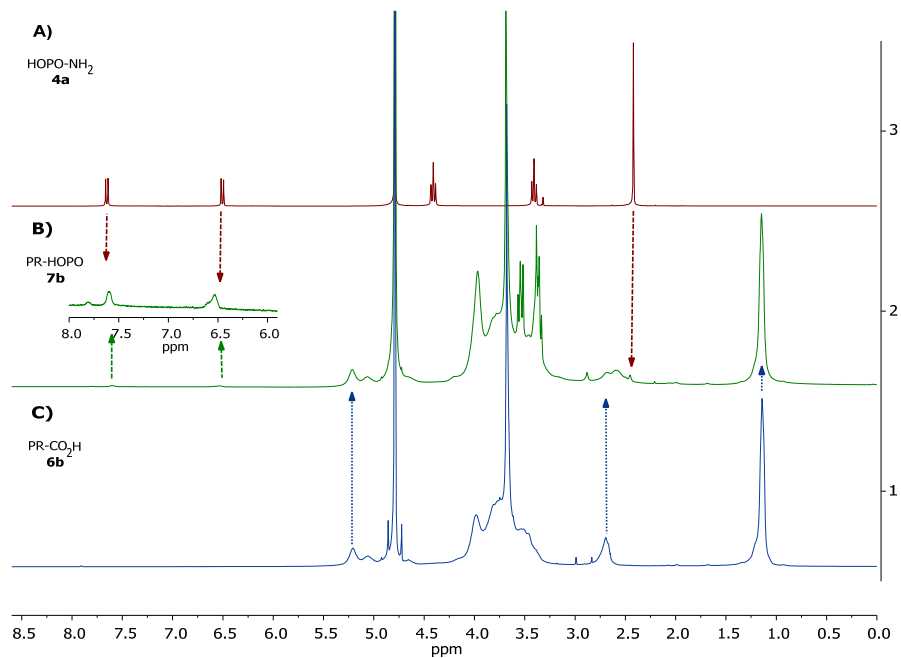

**Figure. S6.** Comparative  $^1\text{H}$  NMR Spectra (300.0 MHz,  $\text{D}_2\text{O}$ ) of **A.** HOPO-NH<sub>2</sub> (**4a**) **B.** PR-HOPO (**7b**) (**4a**) and **C.** PR-CO<sub>2</sub>H (**6b**).

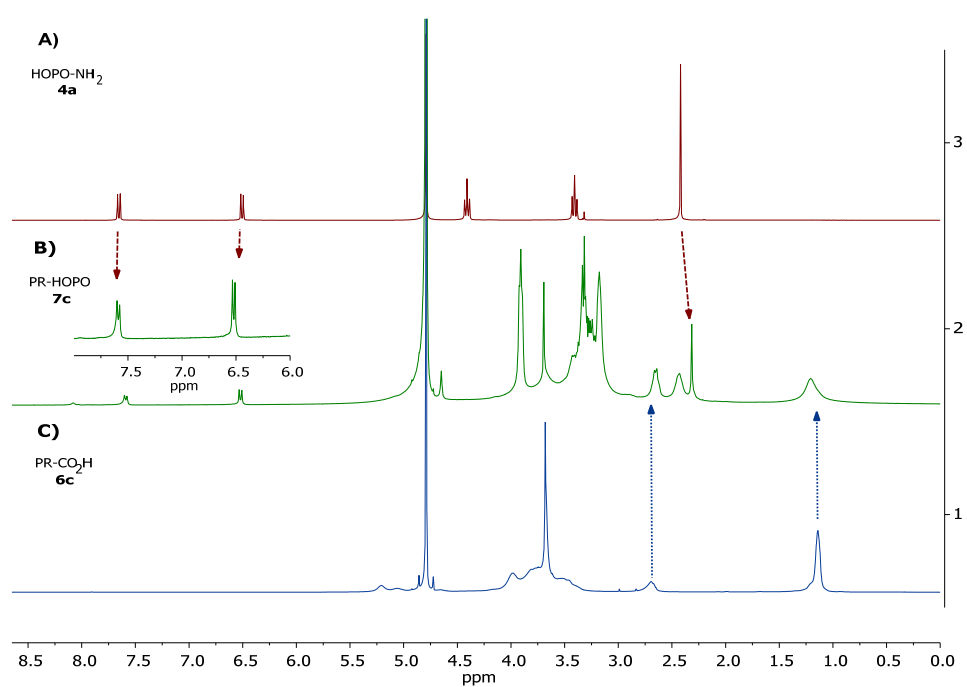

**Figure. S7.** Comparative  $^1\text{H}$  NMR Spectra (300.0 MHz,  $\text{D}_2\text{O}$ ) of **A.** HOPO-NH<sub>2</sub> (**4a**), **B.** PR-HOPO (**7c**) and **C.** PR-CO<sub>2</sub>H (**6c**).

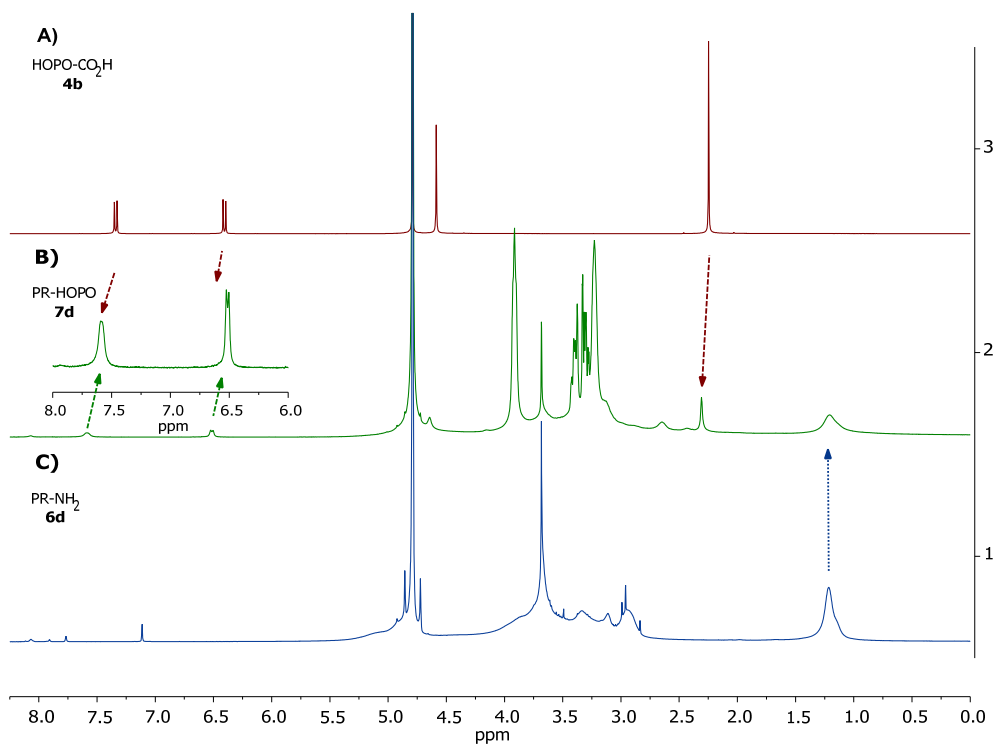

**Figure. S8.** Comparative  $^1\text{H}$  NMR Spectra (300.0 MHz,  $\text{D}_2\text{O}$ ) of **A.** HOPO-CO<sub>2</sub>H (**4b**), **B.** PR-HOPO (**7d**) and **C.** PR-NH<sub>2</sub> (**6d**).

### 1.3 Rheological characterization

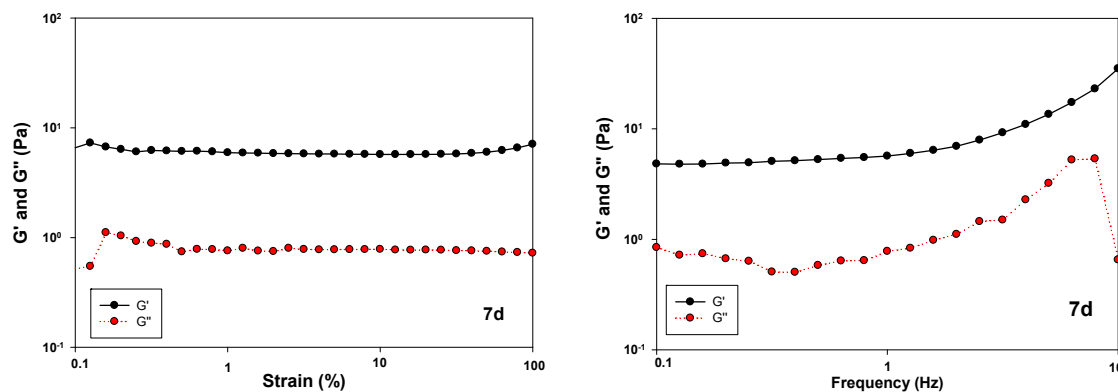

**Figure. S9.** Rheological properties of formulation based on PRNH<sub>2</sub> (**7d**). Strain sweep measurements at 1 Hz (fixed), and frequency sweep measurements at 1% of strain (fixed).

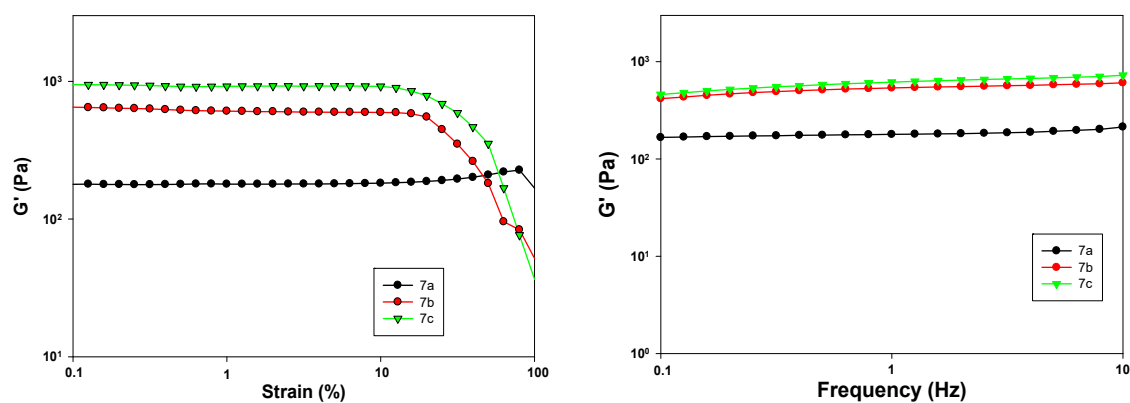

**Figure. S10.** Comparison of  $G'$  moduli of the developed formulations (**7a–c**) at fixed frequency (1 Hz, left) and fixed strain (1%, right).
